# Supplementary material
Source: bioRxiv or medRxiv preprint supplement (https://www.biorxiv.org/highwire/filestream/67373/field_highwire_adjunct_files/1/221085-10.pdf)
Supplement: Supplementary file [file 221085-10.pdf]

## Supplemental References

- Abecasis GR, Auton A, Brooks LD, DePristo MA, Durbin RM, Handsaker RE, Kang HM, Marth GT, McVean GA. 2012. An integrated map of genetic variation from 1,092 human genomes. *Nature* **491**: 56-65.
- Adzhubei IA, Schmidt S, Peshkin L, Ramensky VE, Gerasimova A, Bork P, Kondrashov AS, Sunyaev SR. 2010. A method and server for predicting damaging missense mutations. *Nat Methods* **7**: 248-249.
- Cooper GM, Stone EA, Asimenos G, Program NCS, Green ED, Batzoglou S, Sidow A. 2005. Distribution and intensity of constraint in mammalian genomic sequence. *Genome Res* **15**: 901-913.
- Hoehe MR, Church GM, Lehrach H, Krosiak T, Palczewski S, Nowick K, Schulz S, Suk EK, Huebsch T. 2014. Multiple haplotype-resolved genomes reveal population patterns of gene and protein diplotypes. *Nat Commun* **5**: 5569.
- Mao Q, Ciotlos S, Zhang RY, Ball MP, Chin R, Carnevali P, Barua N, Nguyen S, Agarwal MR, Clegg T et al. 2016. The whole genome sequences and experimentally phased haplotypes of over 100 personal genomes. *Gigascience* **5**: 42.
- Ng PC, Henikoff S. 2001. Predicting deleterious amino acid substitutions. *Genome Res* **11**: 863-874.
- Savova V, Chun S, Sohail M, McCole RB, Witwicki R, Gai L, Lenz TL, Wu CT, Sunyaev SR, Gimelbrant AA. 2016. Genes with monoallelic expression contribute disproportionately to genetic diversity in humans. *Nat Genet* **48**: 231-237.
